# Supplementary material
Source: publisher figshare collection journal article supplement (https://karger.figshare.com/ndownloader/files/13059770)
Supplement: Supplementary file 1 [file 13059770]

**Supplementary data**

Table A

Table A.1

Panel by van Dongen et al. (Euroflow) [29]

|  | PacB | PacO | FITC | PE | PerCPCy5.5 | PECy7 | APC | APCH7 |
| --- | --- | --- | --- | --- | --- | --- | --- | --- |
| 1 | HLADR | CD45 | CD16 | CD13 | CD34 | CD117 | CD11b | CD10 |
| 2 | HLADR | CD45 | CD35 | CD64 | CD34 | CD117 | CD300e | CD14 |
| 3 | HLADR | CD45 | CD36 | CD105 | CD34 | CD117 | CD33 | CD71 |
| 4 | HLADR | CD45 | TdT | CD56 | CD34 | CD117 | CD7 | CD19 |

Table A.2

Panel by Cremers et al. [39]

|  | FITC | PE | PerCP-CY5.5 | PC7 | APC | APC-H7 | V450 | KO |
| --- | --- | --- | --- | --- | --- | --- | --- | --- |
| 1 |  |  | CD34 | CD117 |  |  | HLA-DR | CD45 |
| 2 | CD16 | CD13 | CD34 | CD117 | CD11b | CD10 | HLA-DR | CD45 |
| 3 | CD2 | CD64 | CD34 | CD117 | IREM2 | CD14 | HLA-DR | CD45 |
| 4 | CD36 | CD105 | CD34 | CD117 | CD33 | CD71 | HLA-DR | CD45 |
| 5 | CD5 | CD56 | CD34 | CD117 | CD7 | CD19 | HLA-DR | CD45 |
| 6 | CD15 | CD25 | CD34 | CD117 | CD123 | CD38 | HLA-DR | CD45 |
| 7 | CD7 | CD235a | CD34 | CD117 | CD13 | CD71 | HLA-DR | CD45 |

Table A.3

Panel by Kern et al. [40]

|  | FITC | PE | ECD | PC5 | PC7 |
| --- | --- | --- | --- | --- | --- |
| 1 | CD11b | CD13 | HLADR | CD16 | CD45 |
| 2 | CD71 | CD235a | CD19 | CD2 | CD45 |
| 3 | CD61 | CD5 | CD14 | CD4 | CD45 |
| 4 | CD15 | CD66c | CD3 | CD64 | CD45 |
| 5 | CD65 | CD56 | CD10 | CD33 | CD45 |

Table A.4

Panel by Mathis et al. [38]

|  | FITC | CyTRAK | PC7 | APC | APC-A750 | KrO |
| --- | --- | --- | --- | --- | --- | --- |
| 1 | CD36 |  | CD235a or CD64 | CD117 | CD71 | CD45 |

Table A.5

Panel by Porwit et al. [60]

|  | FITC | PE | ECD | PC5.5 | PC7 | APC | APC-A700 | APC-A750 | PacB | KrO |
| --- | --- | --- | --- | --- | --- | --- | --- | --- | --- | --- |
| Screening | CD4  kappa | CD8  lambda | CD3  CD14 | CD33 | CD20  CD56 | CD34 | CD19 | CD10 | CD5 | CD45 |
| 1 | CD65 | CD13 | CD14 | CD33 | CD34 | CD117 | CD7 | CD11b | CD16 | CD45 |
| 2 | CD35 | CD64 | CD56 | CD33 | CD34 | CD123 | CD19 | CD38 | HLADR | CD45 |
| 3 | CD71 | CD11c | CD4 | CD33 | CD34 | CD2 | CD10 | CD235a | CD15 | CD45 |

Table A.6

Panel by Bardet et al. [61]

|  | FITC | PE | PC5.5 | PC7 | APC | APC-700 | APC-A750 |
| --- | --- | --- | --- | --- | --- | --- | --- |
| 1 | CD45 | CD10 | CD19 | CD34 | CD56 | CD7 | CD5 |
